# Supplementary material
Source: MDPI journal article supplement (https://www.mdpi.com/2311-553X/10/3/32)
Supplement: s1 [file s1]

**A**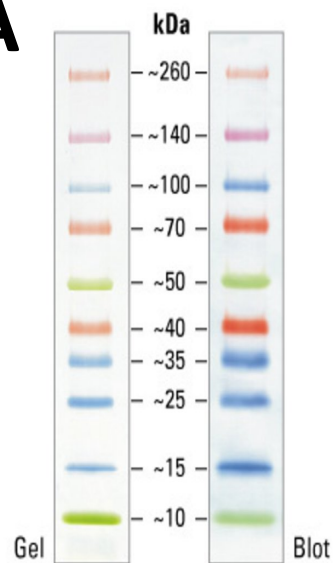**B**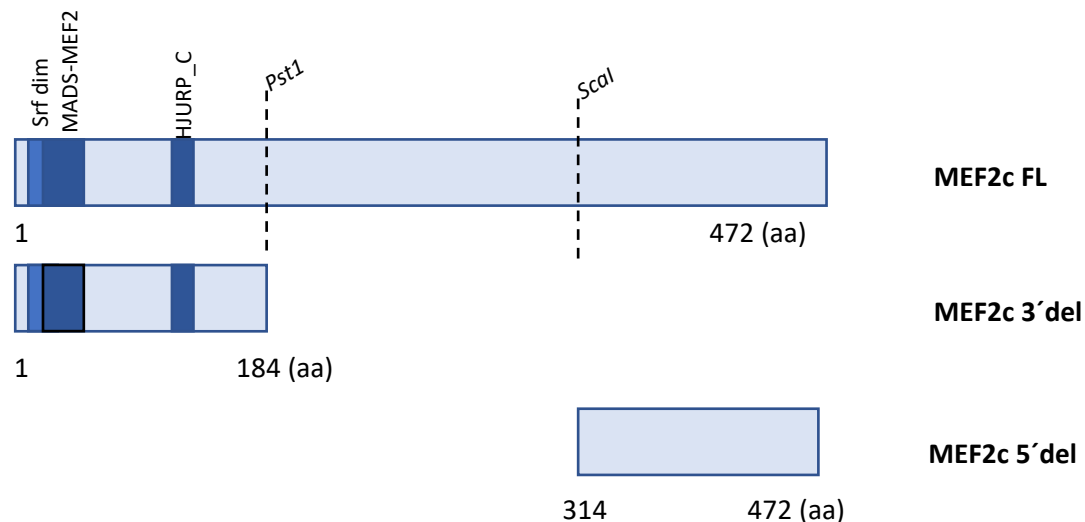**C**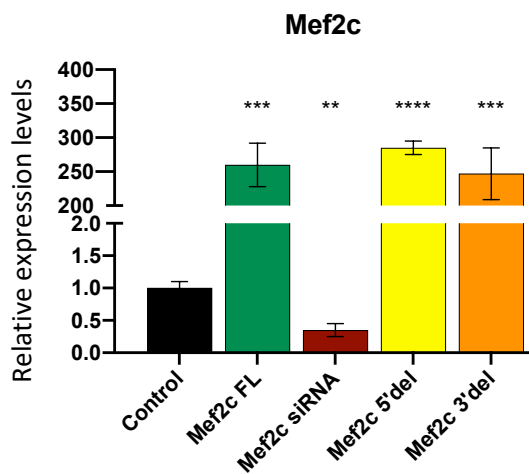**D**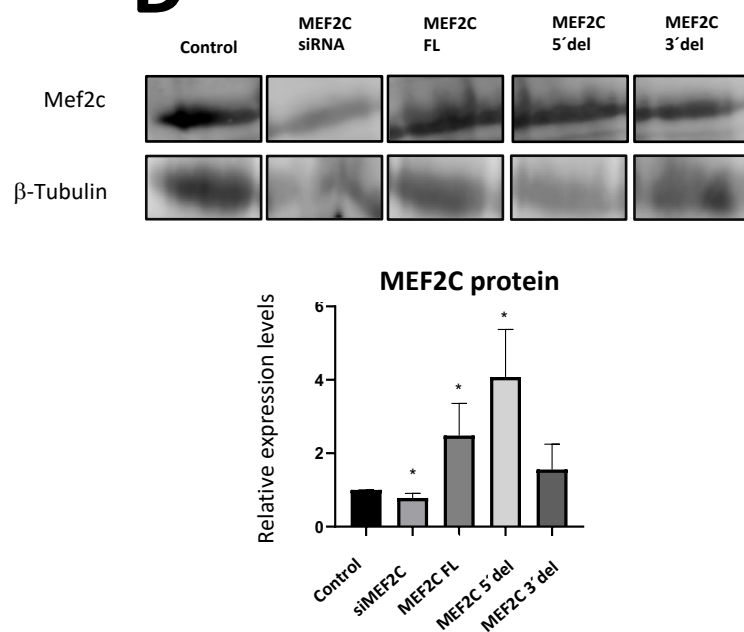**E**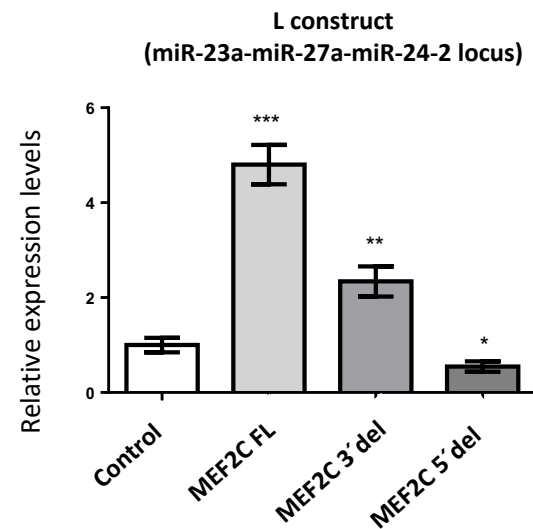

**Supplementary Figure 1**

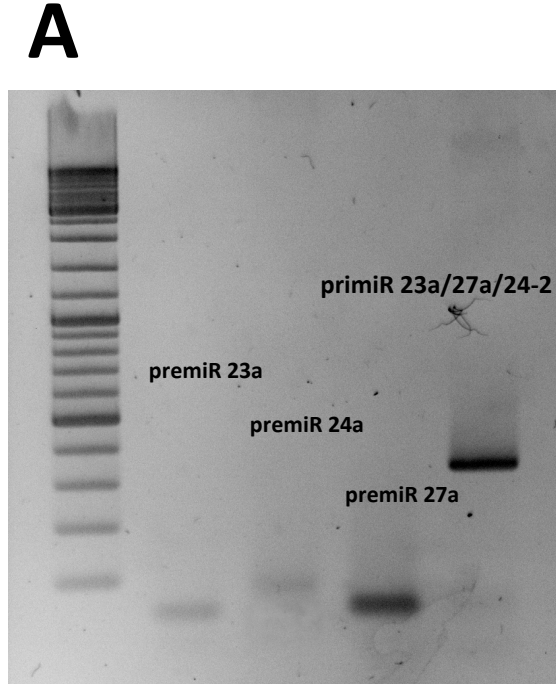

**B**

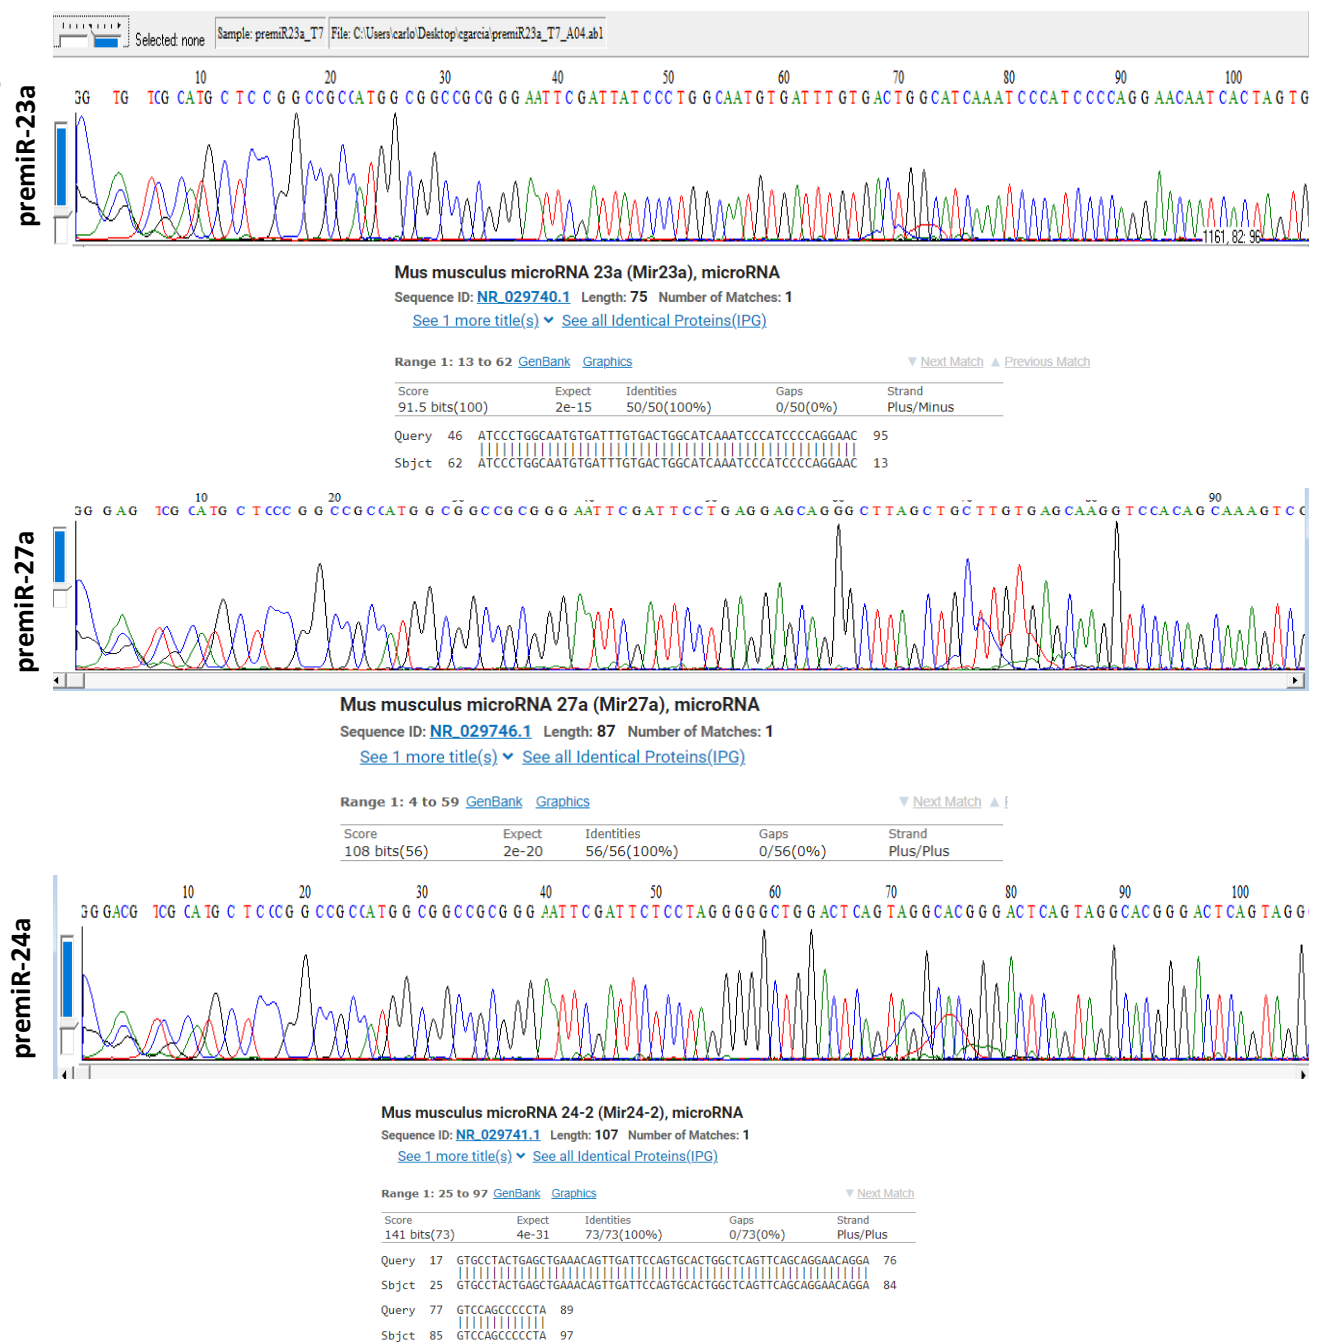

**Supplementary Figure 2**

miR 23a - miR 27a - 24a-2p

GAGTTTCCTCCTGCCCTTCAGGCTTCTAGGAAGTGGCGCCAGCTGGGGTGAGGTCACCTC  
 CTCCCTCCAACCGTCCACCTCCCTCAGCTTCCTCTCCATGGCCCCATTTGGCCTGCTTTG  
 GGCTCAGGGCTGTGGGTGGGGATAGAAGCAGAGTGGGAAGCAGCTGGGAAGGCTCTGCAG  
 CCCCTTTGGCCTTAGGGCTTCAGGCACCTCCCGCTTTGTAGGGCTGGGGTAGAGGCACTG  
 CTGGGTGCCCAGCATCCAGCAGCCTCGCTCCAACCTTCCTACGGATCGATGCTCCTCTTT  
 TTTGGGAATGCTTCTTCCCTCTTGGAAGTAGAGGAGGGCTAGGGTGTGGATCAGCAAGCT  
 GAGTTTAGATTCTGTCCCCAGCACCTTAAACTGTGTGTGGTGAGGTGTACCTATAATC  
 CTAGACTCCAGAGGTAGAGGCAGGAAGAAGTGGTGCATTTCGAAACCTTGTGTTACAGTA  
 TGTGAGACCCAGCCTGGTCAAGATAGGCAGGCAAGCAAGAATGCTCCAATCTCACTGTCT  
 CTTCTTTCTCTCTTTAGGTGCTACACTCCGCTCCACCTGCTGCCCCCTCACTGTGCCT  
 CGGACGGCTGGGGTTCCTGGGGATGGGAATTGATGCCAGTCACAAATCACATTGCCAGGG  
 ATTTCCAACGTACCTTGTGCTCTGCCTTGGGGGCTCCTGTGCGCAAGGATGTCTGTCTTG  
 GGTACTGGGTAAACAGAGAAGCCTATCATGACAAC TGGCCTGAGGAGCAGGGCTTAGCTGC  
 TTGTGAGCAAGGTCCACAGCAAAGTCGTGTTACAGTGGCTAAGTTCCGCCCCCTGGACC  
 CCATCTCCTCAGGCCGCTGCTGCCCCACCCTGCTCTGCCTCCTGGCTGGCAGGGCTCTGCC  
 TCTCTCCGGGCTCC GCCTCCCGTGCCTACTGAGCTGAAACAGTTGATTCCAGTGCACCTGG  
 CTCAGTTCAGCAGGAACAGGAGTCCAGCCCCCTAGGAGCTGGCAACCCTGCAGAATGTCT  
 GCCGTGAGCAAGACCTGGAAACAATGGGGTAATTAGTCCAACCTAAGCCCCGTTGTCTGC  
 TGGAGGCTCAGCCTCTAAGCCTGCATCTGGGTGTCCACCTTGAGATTTCTGTGGTTCCCC  
 AAAGCAGATAGATGGGCGGGTAACCCTTGCAATAAAAGCCAGTTATGTCCCCTCAGGGCC  
 TGGAAGCCCTTCTTTTCTAAGTCTGGTGGGGCTCAGGCACCACCCCTTATACATACCAT  
 CTTTGAAGTCAGTTA

premiR-23a

premiR-27a

premiR-24a

PrimiR 23a-27a-24a

| Name Primer | Sequence              | Amplicon size |
|-------------|-----------------------|---------------|
| Pre_23a_F   | GTTCTGGGGATGGGATTT    | 53 pb         |
| Pre_23a_R   | ATCCCTGGCAATGTGATTTG  |               |
| Pre_27a_F   | CCTGAGGAGCAGGGCTTAG   | 65 pb         |
| Pre_27a_R   | GAACACGACTTTGCTGTGGA  |               |
| Pre_24a_F   | CCTCCCGTGCCTACTGAG    | 90 pb         |
| Pre_24a_R   | CTCCTAGGGGGCTGGACTC   |               |
| Pri_miR_F   | TTTGATGCCAGTCACAAATCA | 387 pb        |
| Pri_miR_R   | GGACTCCTGTTCTGCTGAA   |               |

**Supplementary Figure 3**

| Gene                              | Sequence                  |
|-----------------------------------|---------------------------|
| Mm_Gapdh                          | Fw: GGCATTGCTCTCAATGACAA  |
|                                   | Rv: TGTGAGGGAGATGCTCAGTG  |
| Mm_Mef2c                          | Fw: TGGTTTCCGTAGCAACTCCT  |
|                                   | Rv: AGTTACAGAGCCGAGGTGGA  |
| Mm_Adar1                          | Fw: TGACCAGAGATGGGAAAGCA  |
|                                   | Rv: ACCAGTTGACGCTTGTTC    |
| Mm_Ddx5                           | Fw: ATCTTGATGAGCTGCCCCAA  |
|                                   | Rv: GGTTTTGGACAGTTGTGACCT |
| Mm_Ddx17                          | Fw: CCTCATTGCCACGGATGTAG  |
|                                   | Rv: TATAGGCAGTGCCCTTGTG   |
| Mm_hnRNPa1                        | Fw: TGAAGGGAGGAACTTTGGA   |
|                                   | Rv: TGCCATAGCTACTGCTGCTG  |
| Mm_hnRNPa2b1                      | Fw: GGCAGTCTGGAAAGAAAGAGG |
|                                   | Rv: GGACTTCCTGCATTCTTGTCT |
| Mm_hnRNPa3                        | Fw: GGAGGAGGAGGCTATGATGG  |
|                                   | Rv: CTTCCACCAAACTGCCCC    |
| Mm_Ksrp                           | Fw: ATCGGAGGTGATGCTGCTAC  |
|                                   | Rv: CCTGGGAAGCCAGTTTCTT   |
| Mm_Pre-miR23                      | Fw: GTTCCTGGGGATGGGATTT   |
|                                   | Rv: ATCCCTGGCAATGTGATTG   |
| Mm_Pre-miR27                      | Fw: CCTGAGGAGCAGGGCTTAG   |
|                                   | Rv: GAACACGACTTTGCTGTGGA  |
| Mm_Pre-miR24                      | Fw: CCTCCCGTGCCTACTGAG    |
|                                   | Rv: CTCCTAGGGGGCTGGACTC   |
| hsa-miR-23a, LNA™ PCR primer set  | AUCACAUUGCCAGGGAUUUCC     |
| hsa-miR-27a, LNA™ PCR primer set  | UUCACAGUGGCUAAGUUCCGC     |
| hsa-miR-24.2, LNA™ PCR primer set | UGGCUCAGUUCAGCAGGAACAG    |

| siRNA gene      | Sequence                         |
|-----------------|----------------------------------|
| siRNA Mef2c     | Sense 5' GGGUCGAUAUGCAUUAUUAU UU |
| siRNA Adar1     | Sense 5' GAUUGUCGAACAACAGGAA UU  |
| siRNA Ksrp      | Sense 5' CACCGUGAAUAACAACACU UU  |
| siRNA HnRNPa3   | Sense 5' GGUUGUUCAUAAGGGCUAU UU  |
| siRNA HnRNPa2b1 | Sense 5' GUCUCAUACACAUACCCGU UU  |
| siRNA HnRNPa1   | Sense 5' GUCUGAUAUGACGCUGA UU    |
| siRNA Ddx17     | Sense 5' GGUACUUAUGAGUUCCGA UU   |
| siRNA Ddx5      | Sense 5' GUUAGGUUCACUAUGGGCU UU  |

**Table 1.** List of the primers and siRNA sequences.
